## High post-procedural transvalvular gradient or delayed gradient increase after transcatheter aortic valve implantation: the FRANCE-2 registry

R. Didier<sup>1</sup>, F. Le Ven<sup>1</sup>, H. Eltchaninoff<sup>2</sup>, B. Nasr<sup>3</sup>, T. Lefevre<sup>4</sup>, J. Fajadet<sup>5</sup>, E. Teiger<sup>6</sup>, D. Carrie<sup>7</sup>, N. Meneveau<sup>8</sup>, S. Ghostine<sup>9</sup>, G. Souteyrand<sup>10</sup>, T. Cuisset<sup>11</sup>, H. Le Breton<sup>12</sup>, B. Inug<sup>13</sup>, M. Gilard<sup>1</sup>

<sup>1</sup>Hospital Cavale Blanche, department of cardiology, Brest, France; <sup>2</sup>University Hospital of Rouen, Rouen, France; <sup>3</sup>Hospital Cavale Blanche, Vascular Surgery, Brest, France; <sup>4</sup>Jacques Cartier Private Hospital, Massy, France; <sup>5</sup>Clinic Pasteur, Toulouse, France; <sup>6</sup>Henri Mondor University Hospital Chenevier APHP, Creteil, France; <sup>7</sup>Rangueil Hospital of Toulouse, Toulouse, France; <sup>8</sup>University of Besançon, Besançon, France; <sup>9</sup>Marie Lannelongue Hospital, Le Plessis Robinson, France; <sup>10</sup>University Hospital Gabriel Montpied, Clermont-Ferrand, France; <sup>11</sup>Hospital La Timone of Marseille, Marseille, France; <sup>12</sup>Hospital Pontchaillou of Rennes, Rennes, France; <sup>13</sup>Bichat Hospital, University Paris-Diderot, INSERM-UMR1148, FACT French Alliance for Cardiovascular T, Paris, France

On behalf of FRANCE 2 Registry

**Funding Acknowledgement:** Type of funding source: Public Institution(s). Main funding source(s): French National Society of Cardiology

**Background:** Mean gradient (MG) elevation can be detected immediately post-procedure or secondarily during follow-up. Comparison between these two parameters and impact on outcomes has not previously been investigated.

**Objectives:** The study aimed to identify incidence, influence on prognosis and parameters associated with immediate high post-procedural mean transvalvular gradient (PPMG) and delayed mean gradient increase (DMGI), in the FRANCE 2 (French Aortic National CoreValve and Edwards 2) registry.

**Methods:** The registry includes all consecutive symptomatic patients with severe aortic stenosis. Three groups were analyzed: 1) PPMG <20mmHg without DMGI >10 mmHg (control); 2) PPMG <20mmHg with DMGI >10 mmHg (group 1); 3) PPMG ≥20 mmHg (group 2).

**Results:** From January 2010 to January 2012, 4201 consecutive patients were prospectively enrolled in the registry. The control group comprised 2078 patients; the group 1, 131 patients; and the group 2, 144 patients. DMGI exceeded 10 mmHg in 5.6%, and was not associated with greater 4-year mortality than in control group (32.6% vs. 40.1%,  $p=0.27$ , respectively). PPMG was at least 20 mmHg in 6.1%, and was associated with higher 4-year mortality than in control group (48.7% versus 40.1%,  $p=0.005$ , respectively) (Figure 1). Two-thirds of patients with initial PPMG ≥20 mmHg had finally a MG <20 mmHg at 1 year, with mortality similar to controls (39.2% vs. 40.1%,  $p=0.73$ ).

**Conclusions:** Patients with PPMG >20 mmHg 1 year post-TAVI had higher 4-year mortality than the general population of the registry, unlike patients with MG normalization at 1 year.

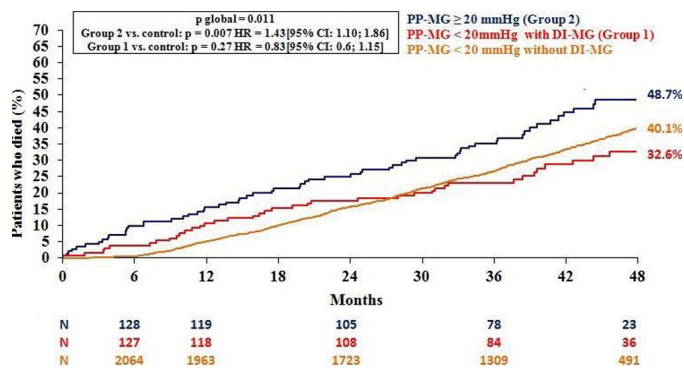

Figure 1
